# Supplementary material
Source: MDPI journal article supplement (https://www.mdpi.com/1999-4907/3/3/818)
Supplement: s1 [file s1]

**Appendix 1.** Diameter, height, volume, whole stem & branch wood plus bark density, wood basic density at breast height (BH), and biomass carbon data for live hardwood and softwood trees and tree ferns sampled from forest throughout New Zealand.

| **Location** | **Species** | **DBH (cm)** | **Ht (m)** | **Volume Stem &Branch ≥10 (m3)** | **Density (kg dm m−3)** | | | **Carbon (kg)** | | | |
| --- | --- | --- | --- | --- | --- | --- | --- | --- | --- | --- | --- |
| **Stem & Branch ≥10** | **BH outer  0–5 cm** | **BH outer  5–15 cm** | **Stem & Branch ≥10** | **Branch <10** | **Foliage** | **Roots** |
| Kaimanawa | *N. fusca* | 21.5 | 16.0 | 0.2952 | 466 | 507 | 532 | 68.85 |  |  |  |
|  | 27.7 | 17.2 | 0.6807 | 497 | 607 | 564 | 169.17 |  |  |  |
| *N. menziesii* | 60.3 | 24.7 | 4.7856 | 458 | 460 | 488 | 1096.20 | 173.16 | 32.69 |  |
|  | 112.9 | 34.0 | 18.8277 | 512 | 500 | 614 | 4818.11 |  |  |  |
|  | 51.5 | 24.0 | 2.5715 |  |  |  |  |  |  |  |
| Hunua | *A. australis* | 35.2 | 20.7 | 0.9258 | 457 |  |  | 211.43 | 38.02 | 12.71 |  |
|  | 26.4 | 17.2 | 0.4917 | 443 |  |  | 109.01 | 16.87 | 12.28 |  |
|  | 15.6 | 13.8 | 0.1479 | 466 |  |  | 34.43 | 4.94 | 3.92 |  |
|  | 22.1 | 17.6 | 0.3407 | 447 |  |  | 76.11 | 10.08 | 8.38 |  |
|  | 10.5 | 10.8 | 0.0531 | 486 |  |  | 12.90 | 2.29 | 1.19 |  |
|  | 6.4 | 7.2 | 0.0163 | 506 |  |  | 4.13 | 0.65 | 0.69 |  |
| Maimai | *N. fusca* | 105 | 31.3 | 12.5287 | 473 |  |  | 2961.24 | 291.16 | 13.86 |  |
|  | 73.0 | 33.1 | 5.8604 | 443 |  |  | 1298.50 | 221.00 | 9.07 |  |
| *N. truncata* | 74.0 | 36.5 | 7.0797 | 504 |  |  | 1783.88 | 161.38 | 17.76 |  |
|  | 41.0 | 25.0 | 1.6760 | 567 |  |  | 474.89 | 156.29 | 4.51 |  |
|  | 31.0 | 19.9 | 0.7945 | 585 |  |  | 232.57 | 23.57 | 4.68 |  |
|  | 81.0 | 21.2 | 4.7312 | 549 |  |  | 1297.70 | 213.44 | 9.14 |  |
|  | 31.0 | 21.6 | 0.8700 | 540 |  |  | 234.82 | 52.56 | 4.40 |  |
|  | 105.0 | 29.6 | 11.5496 | 394 |  |  | 2272.88 | 373.50 | 27.91 |  |
|  | 45.0 | 22.9 | 1.3779 | 414 |  |  | 285.00 | 120.70 | 1.56 |  |
|  | 0.7 | 2.4 |  |  |  |  | 0.03 | 0.01 | 0.02 |  |
|  | 24.0 | 21.2 | 0.4358 | 563 |  |  | 122.65 | 18.94 | 2.47 |  |
|  | 18.2 | 17.1 | 0.2184 | 587 |  |  | 64.13 | 10.27 | 3.08 |  |
|  | 8.8 | 12.2 | 0.0362 | 572 |  |  | 10.35 | 1.77 | 0.32 |  |
| *P. ferruginea* | 32.0 | 23.9 | 1.0619 | 577 |  |  | 306.53 | 27.23 | 3.31 |  |

**Appendix 1.** *Cont.*

| **Location** | **Species** | **DBH (cm)** | **Ht (m)** | **Volume Stem &Branch ≥10 (m3)** | **Density (kg dm m−3)** | | | **Carbon (kg)** | | | |
| --- | --- | --- | --- | --- | --- | --- | --- | --- | --- | --- | --- |
| **Stem & Branch ≥10** | **BH outer  0–5 cm** | **BH outer  5–15 cm** | **Stem & Branch ≥10** | **Branch <10** | **Foliage** | **Roots** |
| Maimai | *W. racemosa* | 33.0 | 15.4 | 0.5949 | 546 |  |  | 162.41 | 27.98 | 5.43 |  |
|  | 42.0 | 16.9 | 1.2299 | 567 |  |  | 348.46 | 59.48 | 9.58 |  |
|  | 1.3 | 3.0 |  |  |  |  | 0.07 | 0.03 | 0.03 |  |
|  | 3.0 | 5.3 |  |  |  |  | 0.52 | 0.15 | 0.15 |  |
|  | 1.5 | 3.1 |  |  |  |  | 0.08 | 0.08 | 0.04 |  |
|  | 2.8 | 4.8 |  |  |  |  | 0.48 | 0.14 | 0.10 |  |
|  | 5.0 | 6.0 |  |  |  |  | 1.36 | 0.29 | 0.08 |  |
|  | 1.2 | 3.4 |  |  |  |  | 0.09 | 0.01 | 0.01 |  |
|  | 3.2 | 4.5 |  |  |  |  | 0.63 | 0.11 | 0.05 |  |
|  | 4.5 | 6.9 |  |  |  |  | 1.60 | 0.23 | 0.20 |  |
|  | 3.9 | 5.8 |  |  |  |  | 1.26 | 0.37 | 0.16 |  |
|  | 1.9 | 3.1 |  |  |  |  | 0.19 | 0.08 | 0.02 |  |
|  | 2.9 | 4.7 |  |  |  |  | 0.42 | 0.10 | 0.07 |  |
|  | 2.8 | 4.4 |  |  |  |  | 0.52 | 0.20 | 0.08 |  |
|  | 4.0 | 4.6 |  |  |  |  | 1.13 | 0.56 | 0.25 |  |
|  | 1.8 | 3.6 |  |  |  |  | 0.21 | 0.05 | 0.04 |  |
|  | 2.3 | 4.3 |  |  |  |  | 0.24 | 0.09 | 0.07 |  |
|  | 3.4 | 3.2 |  |  |  |  | 0.53 | 0.30 | 0.13 |  |
|  | 3.3 | 5.5 |  |  |  |  | 0.85 | 0.17 | 0.15 |  |
|  | 4.5 | 4.6 |  |  |  |  | 1.03 | 0.73 | 0.31 |  |
|  | 3.1 | 5.8 |  |  |  |  | 0.56 | 0.13 | 0.10 |  |
|  | 3.8 | 5.6 |  |  |  |  | 0.67 | 0.39 | 0.11 |  |
|  | 2.3 | 3.7 |  |  |  |  | 0.21 | 0.13 | 0.09 |  |
|  | 4.7 | 6.8 |  |  |  |  | 1.73 | 0.67 | 0.20 |  |
|  | 8.3 | 10.5 | 0.0339 | 553 |  |  | 9.38 | 1.82 | 1.31 |  |
|  | 7.5 | 10.3 | 0.0253 | 559 |  |  | 7.07 | 1.19 | 0.47 |  |
|  | 24.5 | 11.2 | 0.2066 | 453 |  |  | 46.85 | 11.65 | 1.33 |  |

**Appendix 1.** *Cont.*

| **Location** | **Species** | **DBH (cm)** | **Ht (m)** | **Volume Stem &Branch ≥10 (m3)** | **Density (kg dm m−3)** | | | **Carbon (kg)** | | | |
| --- | --- | --- | --- | --- | --- | --- | --- | --- | --- | --- | --- |
| **Stem & Branch ≥10** | **BH outer  0–5 cm** | **BH outer  5–15 cm** | **Stem & Branch ≥10** | **Branch <10** | **Foliage** | **Roots** |
| Maimai | *W. racemosa* | 20.7 | 12.8 | 0.2621 | 477 |  |  | 62.55 | 17.02 | 3.41 |  |
|  | 18.1 | 14.9 | 0.1882 | 495 |  |  | 46.62 | 8.19 | 1.23 |  |
|  | 15.9 | 12.0 | 0.1291 | 552 |  |  | 35.59 | 11.18 | 1.10 |  |
|  | 7.1 | 9.6 | 0.0213 | 581 |  |  | 6.18 | 0.98 | 0.38 |  |
|  | 5.4 | 7.7 | 0.0102 | 526 |  |  | 2.68 | 0.80 | 0.21 |  |
|  | 20.9 | 19.2 | 0.2559 | 545 |  |  | 69.67 | 11.95 | 1.94 |  |
|  | 11.2 | 11.7 | 0.0471 | 511 |  |  | 12.04 | 2.63 | 1.02 |  |
|  | 20.4 | 14.0 | 0.2118 | 535 |  |  | 56.64 | 29.79 | 3.68 |  |
|  | 8.3 | 10.5 | 0.0335 | 636 |  |  | 10.67 | 1.18 | 0.50 |  |
| *C. smithii* | 17.9 | 7.7 | 0.1623 | 125 |  |  | 10.12 | 0.58 | 0.90 |  |
|  | 20.9 | 7.7 | 0.1561 | 178 |  |  | 13.87 | 0.92 | 1.05 |  |
| Manawahe | *B. tawa* | 58.0 | 24.2 | 3.8880 | 528 |  |  | 1025.86 |  |  |  |
| Maunga-tautari | *B. tawa* | 41.8 |  |  |  |  |  |  |  |  |  |
|  | 22.3 | 17.0 | 0.2183 |  |  |  |  |  |  |  |
|  | 37.1 |  |  |  |  |  |  |  |  |  |
|  | 32.5 | 20.0 | 0.7558 |  |  |  |  |  |  |  |
|  | 21.2 | 16.5 | 0.2704 |  |  |  |  |  |  |  |
|  | 39.2 |  |  |  |  |  |  |  |  |  |
|  | 24.2 |  |  |  |  |  |  |  |  |  |
|  | 32.0 |  |  | 483 |  |  |  |  |  |  |
|  | 47.2 |  |  | 539 |  |  |  |  |  |  |
|  | 33.8 |  |  | 514 |  |  |  |  |  |  |
|  | 41.7 |  |  |  |  |  |  |  |  |  |
|  | 57.0 |  |  | 440 |  |  |  |  |  |  |
|  | 23.7 | 20.5 | 0.4232 | 560 | 578 | 546 | 118.49 |  |  |  |
|  | 36.0 | 21.0 | 0.9526 | 542 | 630 | 665 | 258.16 |  |  |  |
| *D.dacrydioides* | 20.4 | 8.2 | 0.1274 | 350 | 382 | 440 | 22.29 |  |  |  |

**Appendix 1.** *Cont.*

| **Location** | **Species** | **DBH (cm)** | **Ht (m)** | **Volume Stem &Branch ≥10 (m3)** | **Density (kg dm m−3)** | | | **Carbon (kg)** | | | |
| --- | --- | --- | --- | --- | --- | --- | --- | --- | --- | --- | --- |
| **Stem & Branch ≥10** | **BH outer  0–5 cm** | **BH outer  5–15 cm** | **Stem & Branch ≥10** | **Branch <10** | **Foliage** | **Roots** |
| Maunga-tautari | *H. arborea* | 18.7 | 14.2 | 0.1933 | 478 | 523 | 575 | 46.21 | 23.87 | 0.38 |  |
|  | 41.2 | 14.3 | 0.7385 | 416 | 557 | 563 | 153.66 | 53.31 | 2.03 |  |
| *K. excelsa* | 45.8 |  |  | 517 |  |  |  |  |  |  |
|  | 43.0 |  |  | 506 |  |  |  |  |  |  |
|  | 22.8 | 18.0 | 0.3454 | 538 | 546 | 544 | 92.96 |  |  |  |
|  | 30.3 | 21.0 | 0.6183 | 532 | 550 | 534 | 164.40 |  |  |  |
| *L. novae-zelandiae* | 32.0 |  |  | 311 |  |  |  |  |  |  |
|  | 52.0 | 23.5 | 1.3876 | 357 | 363 | 395 | 247.39 |  |  |  |
|  | 48.9 |  |  | 321 | 328 | 333 |  |  |  |  |
|  | 24.2 | 12.7 | 0.3075 | 352 | 381 | 399 | 54.04 |  |  |  |
|  | 41.9 | 15.9 | 0.9810 | 348 | 388 | 397 | 170.64 |  |  |  |
|  | 41.2 | 20.0 | 1.4346 | 329 | 366 | 356 | 236.21 |  |  |  |
| *L. calicaris* | 27.3 | 17.0 | 0.3755 | 522 | 578 | 567 | 97.92 |  |  |  |
|  | 32.5 |  |  | 517 | 550 | 573 |  |  |  |  |
|  | 87.9 | 31.2 | 11.0317 | 478 | 516 | 493 | 2639.23 | 263.86 | 8.95 |  |
|  | 20.8 | 15.3 | 0.2095 | 441 | 469 | 494 | 46.16 |  |  |  |
|  | 38.3 | 20.0 | 0.7137 | 381 | 598 | 601 | 136.09 |  |  |  |
|  | 45.4 | 23.0 | 1.3691 | 384 | 534 | 514 | 262.92 |  |  |  |
|  | 28.5 | 17.5 | 0.3676 | 396 | 501 | 511 | 72.83 |  |  |  |
| *W. racemosa* | 33.0 |  |  | 309 |  |  |  |  |  |  |
| *C. dealbata* | 28.5 | 8.2 | 0.5928 | 289 |  |  | 85.69 | 0.00 | 4.79 |  |
| Taranaki | *A. australis* | 24.2 | 20.7 | 0.5331 | 393 | 407 | 420 | 104.63 | 27.43 | 7.55 |  |
|  | 35.4 | 22.0 | 1.1254 | 403 | 441 | 433 | 226.80 | 24.54 | 10.14 |  |
|  | 34.9 | 26.4 | 1.2073 | 386 | 388 | 408 | 232.99 | 30.90 | 13.11 |  |
|  | 29.4 | 23.7 | 0.9184 | 412 | 406 | 418 | 189.27 | 28.01 | 12.66 |  |
|  | 28.5 | 22.4 | 0.8761 | 398 | 424 | 431 | 174.16 | 22.75 | 9.67 |  |
|  | 33.4 | 23.2 | 0.8280 | 424 | 418 | 432 | 175.45 | 57.69 | 27.86 |  |

**Appendix 1.** *Cont.*

| **Location** | **Species** | **DBH (cm)** | **Ht (m)** | **Volume Stem &Branch ≥10 (m3)** | **Density (kg dm m−3)** | | | **Carbon (kg)** | | | |
| --- | --- | --- | --- | --- | --- | --- | --- | --- | --- | --- | --- |
| **Stem & Branch ≥10** | **BH outer  0–5 cm** | **BH outer  5–15 cm** | **Stem & Branch ≥10** | **Branch <10** | **Foliage** | **Roots** |
| Taranaki | *A. australis* | 30.8 | 21.8 | 0.7395 | 428 | 429 | 479 | 158.34 | 35.03 | 21.95 |  |
|  |  | 25.6 | 23.5 | 0.4564 | 413 | 405 | 448 | 94.30 | 16.06 | 6.47 |  |
|  | 27.3 | 22.7 | 0.6493 | 452 | 478 | 466 | 146.73 |  |  |  |
|  | 30.0 | 23.2 | 0.6664 | 441 | 476 | 448 | 147.05 |  |  |  |
|  | 38.9 | 21.3 | 1.2496 | 403 | 396 | 431 | 252.09 |  |  |  |
|  | 30.9 | 23.7 | 0.7851 | 413 | 432 | 442 | 162.31 |  |  |  |
|  | 29.9 | 22.4 | 0.8139 | 425 | 448 | 459 | 173.13 |  |  |  |
|  | 42.9 | 24.1 | 1.7308 | 389 | 427 | 444 | 336.70 |  |  |  |
|  | 39.4 | 24.1 | 1.4279 | 394 | 398 | 406 | 281.09 |  |  |  |
|  | 26.6 | 25.1 | 0.6562 | 436 | 445 | 468 | 142.91 |  |  |  |
|  | 37.8 | 22.1 | 1.3085 | 404 | 451 | 450 | 264.21 |  |  |  |
|  | 46.2 | 23.5 | 2.1666 | 408 | 443 | 435 | 441.72 |  |  |  |
|  | 32.9 | 22.9 | 0.9635 | 441 | 413 | 465 | 212.55 | 37.25 | 19.22 |  |
|  | 38.2 | 23.4 | 1.2420 | 410 | 430 | 446 | 254.71 | 43.98 | 14.96 |  |
| Whirinaki | *B. tawa* | 19.2 | 21.0 | 0.3199 | 539 | 634 | 589 | 86.28 |  |  |  |
|  | 19.8 | 21.7 | 0.3897 | 436 | 512 | 535 | 84.89 |  |  |  |
|  | 34.7 | 27.0 | 1.4516 | 521 | 567 | 571 | 378.05 |  |  |  |
|  | 27.7 | 27.5 | 0.9571 | 489 | 534 | 504 | 234.05 |  |  |  |
| *D. dacrydioides* | 142.0 | 54.0 | 33.4106 | 273 | 293 | 323 | 4556.78 |  |  |  |
| *D. cupressinum* | 59.5 | 43.0 | 5.3165 | 367 | 398 | 490 | 976.32 |  |  |  |
|  | 125.3 | 52.0 | 22.2045 | 460 | 425 | 490 | 5103.67 |  |  |  |
|  | 82.0 | 49.0 | 9.5153 | 473 | 435 | 454 | 2249.45 |  |  |  |
|  | 99.0 | 50.0 | 17.1306 | 410 | 366 | 389 | 3509.34 |  |  |  |
|  | 118.8 | 49.0 | 28.5183 | 457 | 430 | 466 | 6510.53 |  |  |  |
|  |  | 100.5 | 51.0 | 24.0959 | 424 | 365 | 470 | 5104.24 |  |  |  |
|  |  | 112.0 | 53.0 | 28.0359 | 422 | 378 | 461 | 5913.76 |  |  |  |

**Appendix 1.** *Cont.*

| **Location** | **Species** | **DBH (cm)** | **Ht (m)** | **Volume Stem &Branch ≥10 (m3)** | **Density (kg dm m−3)** | | | **Carbon (kg)** | | | |
| --- | --- | --- | --- | --- | --- | --- | --- | --- | --- | --- | --- |
| **Stem & Branch ≥10** | **BH outer  0–5 cm** | **BH outer  5–15 cm** | **Stem & Branch ≥10** | **Branch <10** | **Foliage** | **Roots** |
| Whirinaki | *D. cupressinum* | 130.0 | 52.3 | 28.2403 | 431 | 392 | 454 | 6079.04 |  |  |  |
|  | 62.4 | 44.6 | 6.6200 | 418 | 370 | 483 | 1384.41 |  |  |  |
|  | 130.7 | 51.0 | 32.5160 | 450 | 430 | 483 | 7319.28 |  |  |  |
| *P. totara* | 107.6 | 46.7 | 19.3182 | 309 | 250 | 383 | 2980.91 |  |  |  |
| *P. ferruginea* | 51.2 | 36.8 | 3.5408 | 471 | 511 | 530 | 834.25 |  |  |  |
|  | 57.4 | 35.0 | 5.5840 | 478 | 378 | 496 | 1333.90 |  |  |  |
|  | 58.9 | 35.2 | 4.6846 | 477 | 465 | 522 | 1118.31 |  |  |  |
|  | 43.4 | 31.0 | 2.8766 | 442 | 449 | 500 | 636.29 |  |  |  |
|  | 44.0 | 32.6 | 2.1945 | 478 | 502 | 558 | 524.26 |  |  |  |
|  | 50.3 | 37.8 | 3.6127 | 509 | 530 | 554 | 918.91 |  |  |  |
| *P. taxifolia* | 59.5 | 35.2 | 5.5083 | 536 | 477 | 622 | 1477.02 |  |  |  |
|  | 80.6 | 46.7 | 11.5144 | 453 | 523 | 473 | 2605.16 |  |  |  |
|  | 46.0 | 30.0 | 2.4507 | 554 | 551 | 633 | 679.22 |  |  |  |
|  | 56.6 | 38.0 | 4.8305 | 529 | 529 | 608 | 1277.36 |  |  |  |
| Whaka-rewarewa | *C. dealbata* | 23.8 | 3.6 | 0.1440 | 143 |  |  | 10.29 |  | 6.72 |  |
|  | 26.3 | 1.5 | 0.0270 | 404 |  |  | 5.47 |  | 7.86 |  |
|  | 28.7 | 2.4 | 0.1250 | 278 |  |  | 17.43 |  | 4.86 |  |
|  | 22.6 | 4.2 | 0.1610 | 279 |  |  | 22.42 |  | 5.94 |  |
|  | 29.1 | 2.6 | 0.1470 | 222 |  |  | 16.35 |  | 9.51 | 4.51 |
|  | 32.6 | 3.5 | 0.2320 | 229 |  |  | 26.62 |  | 7.57 |  |
|  | 32.7 | 2.1 | 0.1190 | 204 |  |  | 12.15 |  | 8.55 | 4.55 |
|  | 25.8 | 1.9 | 0.0480 | 181 |  |  | 4.31 |  | 4.63 | 2.89 |
|  | 24.3 | 1.6 | 0.0300 | 282 |  |  | 4.25 |  | 2.82 | 0.87 |
|  | 27.3 | 1.8 | 0.0520 | 343 |  |  | 8.84 |  | 8.70 |  |
|  | 29.1 | 2.8 | 0.1350 | 260 |  |  | 17.56 |  | 7.64 |  |
|  | 29.4 | 3.2 | 0.1830 | 244 |  |  | 22.37 |  | 5.92 |  |
|  | 23.9 | 2.7 | 0.1130 | 275 |  |  | 15.53 |  | 10.31 |  |

**Appendix 1.** *Cont.*

| **Location** | **Species** | **DBH (cm)** | **Ht (m)** | **Volume Stem &Branch ≥10 (m3)** | **Density (kg dm m−3)** | | | **Carbon (kg)** | | | |
| --- | --- | --- | --- | --- | --- | --- | --- | --- | --- | --- | --- |
| **Stem & Branch ≥10** | **BH outer  0–5 cm** | **BH outer  5–15 cm** | **Stem & Branch ≥10** | **Branch <10** | **Foliage** | **Roots** |
| Whaka-rewarewa | *C. dealbata* | 25.5 | 2.2 | 0.1020 | 261 |  |  | 13.37 |  | 9.59 |  |
|  | 27.8 | 3.7 | 0.2210 | 222 |  |  | 24.52 |  | 5.18 |  |
|  | 25.9 | 2.7 | 0.1190 | 304 |  |  | 18.14 |  | 7.09 |  |
|  | 29.9 | 2.8 | 0.1580 | 254 |  |  | 20.10 |  | 7.40 |  |
|  | 27.3 | 3.0 | 0.1600 | 262 |  |  | 20.95 |  | 8.36 |  |
|  | 26.5 | 3.4 | 0.1910 | 256 |  |  | 24.41 |  | 6.48 |  |
|  | 27.0 | 2.2 | 0.0900 | 245 |  |  | 11.02 |  | 6.28 |  |
| *C. medularis* | 27.8 | 6.9 | 0.4640 | 165 |  |  | 38.28 |  | 32.84 | 13.72 |
|  | 11.9 | 2.4 | 0.0210 | 178 |  |  | 1.84 |  | 1.58 | 0.40 |
|  | 22.8 | 6.8 | 0.2750 | 171 |  |  | 23.48 |  | 10.87 |  |
|  | 25.6 | 8.6 | 0.4280 | 165 |  |  | 35.45 |  | 10.65 |  |
|  | 20.1 | 4.8 | 0.1260 | 142 |  |  | 8.97 |  | 6.61 | 1.63 |
|  | 19.8 | 3.0 | 0.0690 | 139 |  |  | 4.80 |  | 4.40 |  |
|  | 23.0 | 3.0 | 0.1070 | 165 |  |  | 8.79 |  | 9.55 | 2.11 |
|  | 25.0 | 5.5 | 0.3150 | 151 |  |  | 23.83 |  | 15.20 |  |
|  | 18.3 | 3.3 | 0.0810 | 203 |  |  | 8.21 |  | 9.90 | 2.85 |
|  | 16.7 | 2.6 | 0.0480 | 151 |  |  | 3.65 |  | 5.33 |  |
|  | 23.9 | 5.3 | 0.3440 | 293 |  |  | 50.32 |  | 13.33 |  |
|  | 23.1 | 7.3 | 0.3070 | 278 |  |  | 42.65 |  | 13.26 |  |
|  | 12.9 | 2.9 | 0.0530 | 182 |  |  | 4.85 |  | 3.72 |  |
|  | 17.4 | 2.9 | 0.0590 | 171 |  |  | 5.00 |  | 3.58 |  |
|  | 19.3 | 2.3 | 0.0490 | 172 |  |  | 4.26 |  | 6.26 |  |
|  | 28.0 | 4.9 | 0.3240 | 222 |  |  | 35.96 |  | 32.06 |  |
|  | 19.6 | 2.8 | 0.0680 | 173 |  |  | 5.89 |  | 7.38 |  |
|  | 21.4 | 3.2 | 0.0980 | 186 |  |  | 9.16 |  | 12.17 |  |
|  | 22.7 | 3.8 | 0.1640 | 199 |  |  | 16.38 |  | 13.14 |  |
|  | 31.7 | 10.2 | 0.6980 | 301 |  |  | 105.10 |  | 12.31 |  |

**Appendix 1.** *Cont.*

| **Location** | **Species** | **DBH (cm)** | **Ht (m)** | **Volume Stem &Branch ≥10 (m3)** | **Density (kg dm m−3)** | | | **Carbon (kg)** | | | |
| --- | --- | --- | --- | --- | --- | --- | --- | --- | --- | --- | --- |
| **Stem & Branch ≥10** | **BH outer  0–5 cm** | **BH outer  5–15 cm** | **Stem & Branch ≥10** | **Branch <10** | **Foliage** | **Roots** |
| Whaka-rewarewa | *C. smithii* | 12.8 | 2.4 | 0.0210 | 233 |  |  | 2.43 |  | 1.46 |  |
|  | 12.7 | 4.7 | 0.0590 | 225 |  |  | 6.63 |  | 0.77 |  |
|  | 12.9 | 2.7 | 0.0240 | 151 |  |  | 1.78 |  | 0.41 | 0.35 |
|  | 12.0 | 5.5 | 0.0810 | 121 |  |  | 4.86 |  | 1.10 | 1.65 |
|  | 22.6 | 2.8 | 0.0830 | 200 |  |  | 8.30 |  | 2.75 |  |
|  | 10.7 | 1.7 | 0.0050 | 257 |  |  | 0.62 |  | 0.34 | 0.21 |
|  | 13.6 | 3.0 | 0.0330 | 206 |  |  | 3.41 |  | 2.44 |  |
|  | 17.1 | 2.6 | 0.0600 | 170 |  |  | 5.08 |  | 1.51 |  |
|  | 13.1 | 3.7 | 0.0380 | 130 |  |  | 2.44 |  | 1.00 | 0.49 |
|  | 14.6 | 3.1 | 0.0340 | 136 |  |  | 2.34 |  | 2.19 | 0.66 |
|  | 16.8 | 3.6 | 0.0620 | 137 |  |  | 4.23 |  | 3.13 |  |
|  | 15.0 | 2.0 | 0.0170 | 201 |  |  | 1.67 |  | 1.55 |  |
|  | 12.0 | 2.1 | 0.0120 | 211 |  |  | 1.27 |  | 1.30 |  |
|  | 13.6 | 2.9 | 0.0270 | 146 |  |  | 2.00 |  | 1.68 |  |
|  | 17.3 | 3.3 | 0.0600 | 226 |  |  | 6.74 |  | 3.97 |  |
|  | 13.5 | 2.0 | 0.0100 | 205 |  |  | 1.06 |  | 0.78 |  |
|  | 15.9 | 3.6 | 0.0570 | 147 |  |  | 4.19 |  | 3.45 |  |
|  | 15.6 | 3.2 | 0.0470 | 147 |  |  | 3.43 |  | 3.02 |  |
|  | 10.4 | 1.6 | 0.0050 | 270 |  |  | 0.66 |  | 0.41 |  |
|  | 13.2 | 2.3 | 0.0170 | 151 |  |  | 1.26 |  | 0.97 |  |
| *D. squarosa* | 12.3 | 1.9 | 0.0070 | 409 |  |  | 1.44 |  | 0.62 |  |
|  | 15.4 | 2.2 | 0.0250 | 255 |  |  | 3.17 |  | 1.11 |  |
|  | 16.8 | 5.4 | 0.1090 | 149 |  |  | 8.15 |  | 1.57 |  |
|  | 15.7 | 3.1 | 0.0480 | 169 |  |  | 4.02 |  | 1.52 | 2.11 |
|  | 11.9 | 1.5 | 0.0090 | 342 |  |  | 1.46 |  | 0.93 | 0.55 |
|  | 17.5 | 3.2 | 0.0530 | 147 |  |  | 3.91 |  | 0.59 |  |

**Appendix 1.** *Cont.*

| **Location** | **Species** | **DBH (cm)** | **Ht (m)** | **Volume Stem &Branch ≥10 (m3)** | **Density (kg dm m−3)** | | | **Carbon (kg)** | | | |
| --- | --- | --- | --- | --- | --- | --- | --- | --- | --- | --- | --- |
| **Stem & Branch ≥10** | **BH outer  0–5 cm** | **BH outer  5–15 cm** | **Stem & Branch ≥10** | **Branch <10** | **Foliage** | **Roots** |
| Whaka-rewarewa | *D. squarosa* | 17.5 | 4.2 | 0.1030 | 212 |  |  | 10.89 |  | 2.28 |  |
|  | 17.2 | 2.4 | 0.0330 | 211 |  |  | 3.53 |  | 1.87 |  |
|  | 18.4 | 4.6 | 0.1150 | 224 |  |  | 12.86 |  | 2.58 | 4.16 |
|  | 17.5 | 2.6 | 0.0520 | 140 |  |  | 3.68 |  | 2.26 | 2.43 |
|  | 14.4 | 4.7 | 0.0750 | 323 |  |  | 12.18 |  | 1.44 |  |
|  | 17.3 | 2.7 | 0.0460 | 190 |  |  | 4.41 |  | 1.98 |  |
|  | 14.2 | 2.1 | 0.0210 | 194 |  |  | 2.02 |  | 1.34 |  |
|  | 16.2 | 2.8 | 0.0590 | 167 |  |  | 4.95 |  | 1.99 |  |
|  | 13.1 | 1.5 | 0.0070 | 262 |  |  | 0.92 |  | 0.66 |  |
|  | 17.1 | 4.1 | 0.0880 | 234 |  |  | 10.32 |  | 2.86 |  |
|  | 13.2 | 2.9 | 0.0300 | 262 |  |  | 3.99 |  | 2.15 |  |
|  | 17.0 | 4.9 | 0.1120 | 264 |  |  | 14.77 |  | 3.35 |  |
|  | 17.0 | 3.4 | 0.0690 | 210 |  |  | 7.26 |  | 2.47 |  |
|  | 17.7 | 3.6 | 0.0790 | 235 |  |  | 9.29 |  | 2.98 |  |

**Appendix 2.** Ratio estimators of species mean whole stem & branch >10 cm wood plus bark density (*dstem*) derived from national wood density surveys. The number of trees sampled, and the *p*-values for regional density differences are given. If species is not tabulated, means by genus or morphology group should be used.

| **Species** | **Mean *dstem*  (kg m−3)** | **No. regions** | **No. studies** | **No. trees** | ***p*-value for test of regional difference** |
| --- | --- | --- | --- | --- | --- |
| *Agathis australis* | 435 | 4 | 7 | 49 | 0.44 |
| *Beilschmiedia taraire* | 527 | 1 | 1 | 3 |  |
| *Beilschmiedia tawa* | 505 | 2 | 9 | 54 | 0.21 |
| *Coprosma grandifolia* | 333 | 1 | 1 | 1 |  |
| *Cunninghamia lanceolata* | 310 | 1 | 1 | 1 |  |
| *Dacrycarpus dacrydioides* | 351 | 3 | 5 | 28 | 0.85 |
| *Dacrydium cupressinum* | 433 | 3 | 9 | 53 | 0.26 |
| *Dysoxylum spectabile* | 424 | 2 | 2 | 6 |  |
| *Elaeocarpus dentatus* | 526 | 2 | 2 | 6 |  |
| *Elaeocarpus hookerianus* | 448 | 2 | 2 | 9 |  |
| *Hedycarya arborea* | 465 | 1 | 2 | 24 |  |
| *Knightia excelsa* | 503 | 2 | 9 | 62 | **0.0054** |
| *Kunzea ericoides* | 635 | 1 | 1 | 1 |  |
| *Lagarostrobos colensoi* | 499 | 1 | 1 | 6 |  |
| *Laurelia novae-zelandiae* | 341 | 2 | 4 | 31 | 0.41 |
| *Libocedrus bidwillii* | 329 | 1 | 1 | 7 |  |
| *Litsea calicaris* | 454 | 2 | 5 | 35 | **0.0021** |
| *Melicytus ramiflorus* | 358 | 1 | 1 | 6 |  |
| *Metrosideros robusta* | 632 | 1 | 1 | 5 |  |
| *Metrosideros umbellata* | 746 | 1 | 6 | 39 |  |
| *Nestegis cunninghamii* | 770 | 1 | 1 | 6 |  |
| *Nothofagus fusca* | 448 | 8 | 79 | 1057 | 0.12 |
| *Nothofagus fusca x N. solandri* var. *cliffortioides* | 468 | 3 | 3 | 4 |  |
| *Nothofagus menziesii* | 445 | 8 | 94 | 1191 | **<0.0001** |
| *Nothofagus solandri* var. *cliffortioides* | 475 | 5 | 37 | 390 | **0.025** |
| *Nothofagus solandri* var. *solandri* | 536 | 6 | 8 | 21 | **0.042** |

**Appendix 2.** *Cont.*

| **Species** | **Mean *dstem* (kg.m−3)** | **No. regions** | **No. studies** | **No. trees** | ***p*-value for test of regional difference** |
| --- | --- | --- | --- | --- | --- |
| *Nothofagus solandri* var. *solandri x N. solandri* var. *cliffortioides* | 462 | 1 | 2 | 6 |  |
| *Nothofagus truncata* | 525 | 5 | 53 | 894 | 0.13 |
| *Phyllocladus trichomanoides* | 489 | 2 | 2 | 6 |  |
| *Podocarpus totara* | 370 | 2 | 3 | 19 | 0.61 |
| *Prumnopitys ferruginea* | 482 | 4 | 6 | 34 | 0.30 |
| *Prumnopitys taxifolia* | 499 | 3 | 5 | 32 | 0.52 |
| *Pseudowintera colorata* | 389 | 1 | 1 | 1 |  |
| *Quintinia serrata* | 427 | 1 | 16 | 112 |  |
| *Weinmannia racemosa* | 469 | 3 | 28 | 214 | 0.088 |

Whole stem & branches ≥10 cm density over bark by genus.

| **Genus** | **Mean *dstem* (kg m−3)** |
| --- | --- |
| *Acer* | 488 |
| *Beilschmiedia* | 516 |
| *Coprosma* | 333 |
| *Elaeocarpus* | 487 |
| *Eucalyptus* | 477 |
| *Fraxinus* | 508 |

Whole stem & branches ≥10 cm density over bark by morphology group.

| **Morphology** | **Mean *dstem* (kg m−3)** |
| --- | --- |
| canopy tree | 476 |
| subcanopy tree | 493 |
| cabbage tree/palm | 197 |
| shrub/other | 333 |

**Appendix 3.** Dead wood density modifiers.

| **Species** | **Decay class** | | | |
| --- | --- | --- | --- | --- |
| 0 | 1 | 2 | 3 |
| *Nothofagus solandri* var. *Cliffortioides* | 1 | 0.79 | 0.58 | 0.45 |
| *Nothofagus fusca* | 1 | 0.73 | 0.61 | 0.33 |
| *Weinmannia racemosa* | 1 | 0.92 | 0.82 | 0.47 |
| *Metrosideros umbellata* | 1 | 0.75 | 0.64 | 0.62 |
| Other/Unknown | 1 | 0.82 | 0.66 | 0.47 |
